# Supplementary material for: Biodiversity of Actinomycetes from Heavy Metal Contaminated Technosols
Source: MDPI journal article supplement (doi:10.3390/microorganisms9081635), 2021-07-30
Supplement: s1 [file s1]

**Supplementary Table S1.** List of streptomycete strains from heavy metal contaminated areas.

| Streptomyces isolate | Strain                                   | Accession number                                                     | Clade [1] | Isolation site                                                                                           | Country | Resistance     | Literature |
|----------------------|------------------------------------------|----------------------------------------------------------------------|-----------|----------------------------------------------------------------------------------------------------------|---------|----------------|------------|
| S. sp.               | EK-I92                                   | GU935327                                                             | x         | Farmland near Sered'                                                                                     | SK      | ?              | [2]        |
| S. sp.               | EK-I89                                   | GU935324                                                             | 40        |                                                                                                          |         | ?              |            |
| S. sp.               | K11                                      | JX982494                                                             | x         | Žiar nad Hronom disposal site                                                                            |         | Zn             | [3]        |
| S. sp.               | M3                                       | AY741284                                                             | 103       | Wastewater of a copper filter plant                                                                      | AR      | Cr             | [4]        |
| S. sp.               | M40                                      | AY741285                                                             | 103       |                                                                                                          |         |                |            |
| S. sp.               | M46                                      | AY741286                                                             | x         |                                                                                                          |         |                |            |
| S. sp.               | AB2A                                     | AY741363                                                             | 75        | Copper polluted sediments, Tucumán                                                                       | AR      | Cu             | [5,6]      |
| S. sp.               | AB3                                      | AY741364                                                             | 100       |                                                                                                          |         |                |            |
| S. sp.               | AB5A                                     | EF527810                                                             | 80        |                                                                                                          |         |                |            |
| S. sp.               | F4                                       | DQ141201                                                             | 103       | Former uranium mine, Thuringia                                                                           | DE      | Cd             | [7]        |
| S. sp.               | P5                                       | AF401982                                                             | 39        | Closed gold mines, Cheon-an and Kong-ju                                                                  | KR      | Pb             | [8]        |
| S. sp.               | C1                                       | AF403713                                                             | 29        |                                                                                                          |         |                |            |
| S. sp.               | R22                                      | AF331829                                                             | 46        | Polluted areas in the Salí River                                                                         | AR      | Cr             | [9]        |
| S. sp.               | R25                                      | AF331830                                                             | ?         |                                                                                                          |         |                |            |
| S. sp.               | CHR28                                    | AF026081                                                             | ?         | Metal-contaminated sediments from Baltimore Inner Harbor                                                 | USA     | Hg             | [10]       |
| S. sp.               | CHR3                                     | AF026080                                                             | 103       |                                                                                                          |         |                |            |
| S. sp.               | M4                                       | ?                                                                    | ?         | Anthropogenically contaminated soils, Brno city                                                          | CZ      | Zn, Cu         | [11]       |
| S. sp.               | ON3                                      | ?                                                                    | ?         |                                                                                                          |         | Zn, Cu         |            |
| S. acidiscabies      | NB05-2F                                  | FJ546739                                                             | 5         | Polluted site at the former uranium mine, Thuringia                                                      | DE      | Cu, Cd, Zn, Ni | [12]       |
| S. sp.               | P16A-1, P10A-3                           | ?                                                                    | 20        | Banks of creeks in above mentioned area, polluted as a consequence of inflow of acid mine drainage water |         | Ni, Zn         | [13,14]    |
| S. sp.               | P4B-1, P10A-4                            | ?                                                                    | 114       |                                                                                                          |         | Ni, Zn         |            |
| S. sp.               | P6A-1                                    | ?                                                                    | x         |                                                                                                          |         | Ni, Zn         |            |
| S. sp.               | P9A-1                                    | ?                                                                    | x         |                                                                                                          |         | Ni, Zn         |            |
| S. sp.               | K7A-1                                    | ?                                                                    | 20        |                                                                                                          |         | Ni, Zn         |            |
| S. plumbiresistens   | CCNW HX 13-160                           | EU526954                                                             | x         | Lead-polluted soil, Gansu province                                                                       | CN      | Pb             | [15]       |
| S. zinciresistens    | CCNW NQ 0016                             | GU225938                                                             | 90        | Zinc and copper mine, Shaanxi province                                                                   | CN      | Zn             | [16,17]    |
| S. thermocarboxydus  | NH50                                     | AJ249627                                                             | 109       | Soil contaminated with metal finishing effluents, Rhône-Alpes                                            | FR      | Cr             | [18]       |
| S. sp.               | BN2, BN9, BN, 12, BN23, BN69, BN71, SB22 | KF479164, KF479168, KF479169, KF479178, KF479173, KF479179, KF479188 | 126       | Abandoned mining areas, Marrakech                                                                        | MR      | Pb, Zn, Cr, Cd | [19]       |

|                      |                                                  |                                                                           |     |                                                                                                     |    |                           |         |
|----------------------|--------------------------------------------------|---------------------------------------------------------------------------|-----|-----------------------------------------------------------------------------------------------------|----|---------------------------|---------|
| S. sp.               | BN3,<br>BN4,<br>BN24,<br>BN68,<br>BN72           | KF479165,<br>KF479167,<br>KF479166,<br>KF479174,<br>KF479177,<br>KF479180 | 112 |                                                                                                     |    |                           |         |
| S. sp.               | BN7,<br>BN13,<br>BN17,<br>BN22,<br>BN25,<br>BN48 | KF479170,<br>KF479171,<br>KF479172,<br>KF479175,<br>KF479176              | 113 |                                                                                                     |    |                           |         |
| S. sp.               | BN73                                             | KF479181                                                                  | 119 |                                                                                                     |    |                           |         |
| S. sp.               | BN82                                             | KF479182                                                                  | x   |                                                                                                     |    |                           |         |
| S. sp.               | GT1,<br>GT2                                      | KF479183,<br>KF479184,                                                    | 26  |                                                                                                     |    |                           |         |
| S. sp.               | SB30,<br>SB31                                    | KF479189,<br>KF479190                                                     | x   |                                                                                                     |    |                           |         |
| S. griseorubens      | BUCBT-09                                         | KP228016                                                                  | 100 | Soil contaminated with pesticides and heavy metals, Santiago del Estero                             | AR | Cr                        | [20,21] |
| S. sp.               | H-KF8                                            | KT799850                                                                  | 6   | Marine sediments of the Comau Fjord with the natural occurrence of heavy metals, Northern Patagonia | CL | Cu, Co, Hg, Cr, Ni and Te | [22,23] |
| S. sporoverrucosus   | dwc-3                                            | KC508633.1                                                                | 39  | Disposal site for (ultra-) low uraniferous radioactive waste                                        | CN | -                         | [24]    |
| S. cyaneochromogenes | MK-45                                            | NR_170501.1                                                               | x   | Manganese-contaminated area, Xiangtan                                                               | CN | -                         | [25]    |
| S. sp.               | CdTB01                                           | NZ_CP013743.1                                                             | x   | Soil contaminated with heavy metals in Xiangxi Tujia and Miao, Hunan Province                       | CN | Cu, Cr, Cd, Zn            | [26]    |
| S. cadmiisoli        | ZFG47                                            | NR_171522.1                                                               | x   | Soil in a cadmium-contaminated area in Xiangtan City, Hunan Province                                | CN | -                         | [27]    |
| S. xiangtanensis     | LUSFXJ                                           | NR_164877.1                                                               | x   | Manganese-polluted soil, Xiangtan Manganese Mine                                                    | CN | -                         | [28]    |
| S. manganisoli       | MK 44                                            | KY911452.1                                                                | x   |                                                                                                     |    | -                         | [29]    |
| S. ciscaucasicus     | CCNW HX 72-14                                    | EU744543                                                                  | 8   | Lead zinc mine tailing                                                                              | CN | Zn, Cu, Cd                | [30]    |

x = not in the study of the authors Labeda *et al.* [1],

? = no data

## References

1. Labeda, D. P.; Goodfellow, M.; Brown, R.; Ward, A. C.; Lanoot, B.; Vannanneyt, M.; Swings, J.; Kim, S.-B.; Liu, Z.; Chun, J.; Tamura, T.; Oguchi, A.; Kikuchi, T.; Kikuchi, H.; Nishii, T.; Tsuji, K.; Yamaguchi, Y.; Tase, A.; Takahashi, M.; Sakane, T.; Suzuki, K. I.; Hatano, K. Phylogenetic Study of the Species within the Family Streptomycetaceae. *Antonie van Leeuwenhoek* **2012**, *101*, 73–104, doi:10.1007/s10482-011-9656-0.
2. Karelová, E.; Harichová, J.; Stojnev, T.; Pangallo, D.; Ferienc, P. The Isolation of Heavy-Metal Resistant Culturable Bacteria and Resistance Determinants from a Heavy-Metal-Contaminated Site. *Biologia* **2011**, *66*, 18–26, doi:10.2478/s11756-010-0145-0.
3. Sedlakova-Kadukova, J.; Kopcakova, A.; Gresakova, L.; Godany, A.; Pristas, P. Bioaccumulation and Biosorption of Zinc by a Novel Streptomyces K11 Strain Isolated from Highly Alkaline Aluminium Brown Mud Disposal Site. *Ecotoxicol Environ Saf.* **2019**, *167*, 204–211, doi:10.1016/j.ecoenv.2018.09.123.
4. Polti, M. A.; Amoroso, M. J.; Abate, C. M. Chromium(VI) Resistance and Removal by Actinomycete Strains Isolated from Sediments. *Chemosphere* **2007**, *67*, 660–667, doi:10.1016/j.chemosphere.2006.11.008.
5. Albarracín, V. H.; Amoroso, M. J.; Abate, C. M. Isolation and Characterization of Indigenous Copper-Resistant Actinomycete Strains. *Geochemistry* **2005**, *65*, 145–156, doi:10.1016/j.chemer.2005.06.004.
6. Albarracín, V. H.; Ávila, A. L.; Amoroso, M. J.; Abate, C. M. Copper Removal Ability by *Streptomyces* Strains with Dissimilar Growth Patterns and Endowed with Cupric Reductase Activity. *FEMS Microbiol. Lett.* **2008**, *288*, 141–148, doi:10.1111/j.1574-6968.2008.01335.x.
7. Siñeriz, M. L.; Kothe, E.; Abate, C. M. Cadmium Biosorption by Streptomyces Sp. F4 Isolated from Former Uranium Mine. *J. Basic Microbiol.* **2009**, *49*, 55–62, doi:10.1002/jobm.200700376.
8. Rho, J.-Y.; Kim, J.-H. Heavy Metal Biosorption and Its Significance to Metal Tolerance of Streptomycetes. *J. Microbiol.* **2002**, *40*, 51–54.
9. Amoroso, M. J.; Castro, G. R.; Durán, A.; Peraud, O.; Oliver, G.; Hill, R. T. Chromium Accumulation by Two Streptomyces Spp. Isolated from Riverine Sediments. *J Ind Microbiol Biotechnol.* **2001**, *26*, 210–215, doi:10.1038/sj.jim.7000112.
10. Ravel, J.; Amoroso, M. J.; Colwell, R. R.; Hill, R. T. Mercury-Resistant Actinomycetes from the Chesapeake Bay. *FEMS Microbiol. Lett.* **1998**, *162*, 177–184, doi:10.1111/j.1574-6968.1998.tb12996.x.
11. Majzlik, P.; Strasky, A.; Adam, V.; Nemec, M.; Trnkova, L.; Zehnalek, J.; Hubalek, J.; Provaznik, I.; Kizek, R. Influence of Zinc(II) and Copper(II) Ions on Streptomyces Bacteria Revealed by Electrochemistry. *Int. J. Electrochem. Sci.* **2011**, *6*, 2171–2191.
12. Schmidt, A.; Schmidt, A.; Haferburg, G.; Kothe, E. Superoxide Dismutases of Heavy Metal Resistant Streptomycetes. *J Basic Microbiol.* **2007**, *47*, 56–62, doi:10.1002/jobm.200610213.
13. Schmidt, A.; Haferburg, G.; Schmidt, A.; Lischke, U.; Merten, D.; Ghergel, F.; Büchel, G.; Kothe, E. Heavy Metal Resistance to the Extreme: Streptomyces Strains from a Former Uranium Mining Area. *Geochemistry* **2009**, *69*, 35–44, doi:10.1016/j.chemer.2007.11.002.
14. Schmidt, A.; Haferburg, G.; Sineriz, M.; Merten, D.; Büchel, G.; Kothe, E. Heavy Metal Resistance Mechanisms in Actinobacteria for Survival in AMD Contaminated Soils. *Geochemistry* **2005**, *65*, 131–144, doi:10.1016/j.chemer.2005.06.006.

15. Guo, J. K.; Lin, Y. B.; Zhao, M. L.; Sun, R.; Wang, T. T.; Tang, M.; Wei, G. H. *Streptomyces Plumbiresistens* Sp. Nov., a Lead-Resistant Actinomycete Isolated from Lead-Polluted Soil in North-West China. *Int J Syst Evol Microbiol.* **2009**, *59*, 1326–1330, doi:10.1099/ijms.0.004713-0.
16. Lin, Y.; Wang, X.; Wang, B.; Mohamad, O.; Wei, G. Bioaccumulation Characterization of Zinc and Cadmium by *Streptomyces Zinciresistens*, a Novel Actinomycete. *Ecotoxicol Environ Saf.* **2012**, *77*, 7–17, doi:10.1016/j.ecoenv.2011.09.016.
17. Lin, Y. B.; Wang, X. Y.; Li, H. F.; Wang, N. N.; Wang, H. X.; Tang, M.; Wei, G.-H. *Streptomyces Zinciresistens* Sp. Nov., a Zinc-Resistant Actinomycete Isolated from Soil from a Copper and Zinc Mine. *Int J Syst Evol Microbiol.* **2011**, *61*, 616–620, doi:10.1099/ijms.0.024018-0.
18. Desjardin, V.; Bayard, R.; Huck, N.; Manceau, A.; Gourdon, R. Effect of Microbial Activity on the Mobility of Chromium in Soils. *Waste Management* **2002**, *22*, 195–200, doi:10.1016/S0956-053X(01)00069-1.
19. El Baz, S.; Baz, M.; Barakate, M.; Hassani, L.; el Gharmali, A.; Imziln, B. Resistance to and Accumulation of Heavy Metals by Actinobacteria Isolated from Abandoned Mining Areas. *ScientificWorldJournal.* **2015**, *2015*, doi:10.1155/2015/761834.
20. Dávila Costa, J. S.; Hoskisson, P. A.; Paterlini, P.; Romero, C. M.; Alvarez, A. Whole Genome Sequence of the Multi-Resistant Plant Growth-Promoting Bacteria *Streptomyces* Sp. Z38 with Potential Application in Agroindustry and Bio-Nanotechnology. *Genomics* **2020**, *112*, 4684–4689, doi:10.1016/j.ygeno.2020.08.022.
21. Simón Solá, M. Z.; Lovaisa, N.; Dávila Costa, J. S.; Benimeli, C. S.; Polti, M. A.; Alvarez, A. Multi-Resistant Plant Growth-Promoting Actinobacteria and Plant Root Exudates Influence Cr(VI) and Lindane Dissipation. *Chemosphere* **2019**, *222*, 679–687, doi:10.1016/j.chemosphere.2019.01.197.
22. Undabarrena, A.; Ugalde, J. A.; Seeger, M.; Cámara, B. Genomic Data Mining of the Marine Actinobacteria *Streptomyces* Sp. H-KF8 Unveils Insights into Multi-Stress Related Genes and Metabolic Pathways Involved in Antimicrobial Synthesis. *PeerJ* **2017**, *5*, 1–35, doi:10.7717/peerj.2912.
23. Undabarrena, A.; Beltrametti, F.; Claverías, F. P.; González, M.; Moore, E. R. B.; Seeger, M.; Cámara, B. Exploring the Diversity and Antimicrobial Potential of Marine Actinobacteria from the Comau Fjord in Northern Patagonia, Chile. *Front Microbiol.* **2016**, *7*, doi:10.3389/fmicb.2016.01135.
24. Li, X.; Ding, C.; Liao, J.; Du, L.; Sun, Q.; Yang, J.; Yang, Y.; Zhang, D.; Tang, J.; Liu, N. Bioaccumulation Characterization of Uranium by a Novel *Streptomyces Sporoverrucosus* Dwc-3. *J Environ Sci (China).* **2016**, *41*, 162–171, doi:10.1016/j.jes.2015.06.007.
25. Tang, X.; Zhao, J.; Li, K.; Chen, Z.; Sun, Y.; Gao, J. *Streptomyces Cyaneochromogenes* Sp. Nov., a Blue Pigment-Producing Actinomycete from Manganese-Contaminated Soil. *Int J Syst Evol Microbiol.* **2019**, *69*, 2202–2207, doi:10.1099/ijsem.0.003406.
26. Zhou, G.; Yang, H.; Zhou, H.; Wang, C.; Fu, F.; Yu, Y.; Lu, X.; Tian, Y. Complete Genome Sequence of the *Streptomyces* Sp. Strain CdTB01, a Bacterium Tolerant to Cadmium. *J Biotechnol.* **2016**, *229*, 42–43, doi:10.1016/j.jbiotec.2016.04.040.
27. Li, K.; Tang, X.; Zhao, J.; Guo, Y.; Tang, Y.; Gao, J. *Streptomyces Cadmiisoli* Sp. Nov., a Novel Actinomycete Isolated from Cadmium-Contaminated Soil. *Int J Syst Evol Microbiol.* **2019**, *69*, 1024–1029, doi:10.1099/ijsem.0.003262.
28. Mo, P.; Yu, Y.-Z.; Zhao, J.-R.; Gao, J. *Streptomyces Xiangtanensis* Sp. Nov., Isolated from a Manganese-Contaminated Soil. *Antonie van Leeuwenhoek* **2017**, *110*, 297–304, doi:10.1007/s10482-016-0797-z.

29. Mo, P.; Zhao, J.; Li, K.; Tang, X.; Gao, J. *Streptomyces Manganisoli* Sp. Nov., a Novel Actinomycete Isolated from Manganese-Contaminated Soil. *Int J Syst Evol Microbiol.* **2018**, *68*, 1890–1895, doi:10.1099/ijsem.0.002762.
30. Li, H.; Lin, Y.; Guan, W.; Chang, J.; Xu, L.; Guo, J.; Wei, G. Biosorption of Zn(II) by Live and Dead Cells of *Streptomyces Ciscaucasicus* Strain CCNWHX 72-14. *J Hazard Mater.* **2010**, *179*, 151–159, doi:10.1016/j.jhazmat.2010.02.072.
